# Supplementary material
Source: Springer Nature journal article supplement (https://www.springermedizin.de/resource/supplementary/13063_2014_2096_MOESM2_ESM.pdf/9621330)
Supplement: MOESM2 [file 9621330]

## LeoPARDS study drug infusion protocol

Levosimendan can cause vasodilation and increased heart rate.

If blood pressure drops a fluid bolus should be given, volume status reassessed and treated, and vasopressors titrated.

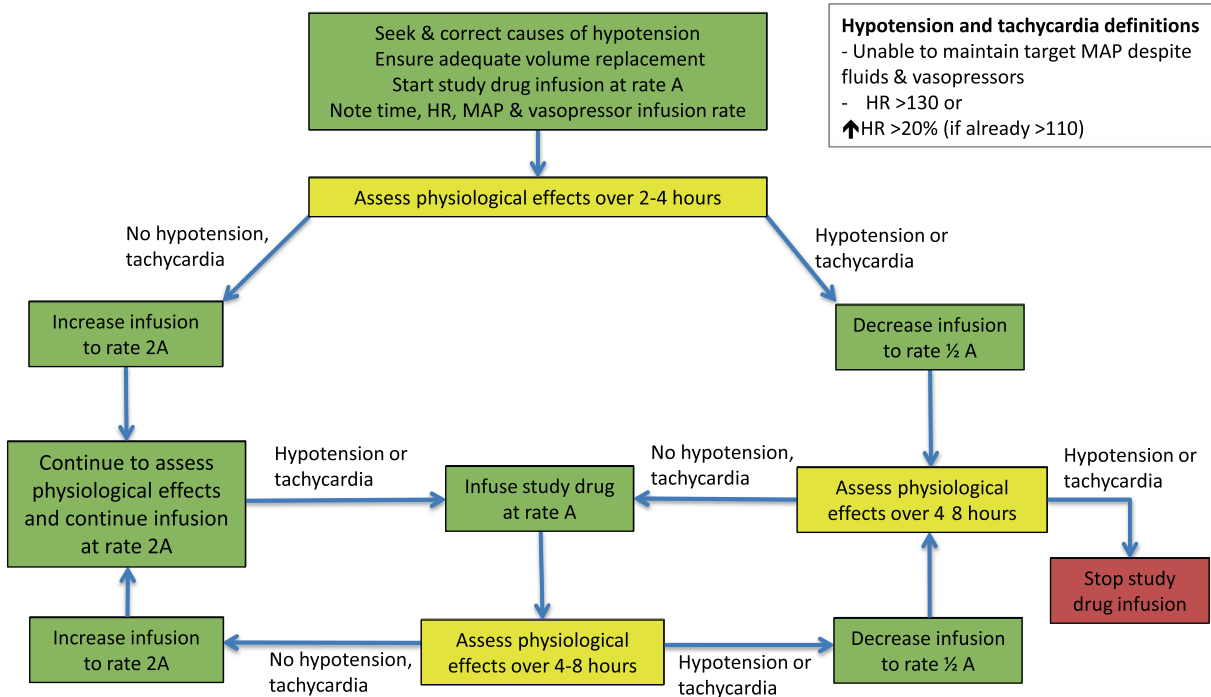

**All study drug infusions should stop at 24 hours**
